# Supplementary material for: Surveying Moths Using Light Traps: Effects of Weather and Time of Year
Source: PLoS One. 2014 Mar 17;9(3):e92453. doi: 10.1371/journal.pone.0092453 (PMC3956935; doi:10.1371/journal.pone.0092453)
Supplement: Table S1 — (XLSX) [file pone.0092453.s001.xlsx]

## Sheet: Table S1
Species	Family	250W	40W	Total
Abrostola tripartita	Noctuidae	6	3	9
Abrostola triplasia	Noctuidae	79	22	101
Achyla flavicornis	Drepanidae	1	0	1
Acronicta aceris	Noctuidae	0	9	9
Acronicta alni	Noctuidae	1	0	1
Acronicta auricoma	Noctuidae	17	19	36
Acronicta leporina	Noctuidae	3	2	5
Acronicta megacephala	Noctuidae	25	22	47
Acronicta psi	Noctuidae	2	5	7
Acronicta rumicis	Noctuidae	9	3	12
Actinotia polyodon	Noctuidae	18	13	31
Agriopis aurantiaria	Geometridae	1	11	12
Agriopis leucophaearia	Geometridae	6	0	6
Agriopis marginaria	Geometridae	2	4	6
Agrius convolvuli	Sphingidae	3	4	7
Agrochola circellaris	Noctuidae	43	40	83
Agrochola laevis	Noctuidae	1	0	1
Agrochola litura	Noctuidae	16	23	39
Agrochola lota	Noctuidae	9	13	22
Agrochola lychnidis	Noctuidae	2	1	3
Agrochola macilenta	Noctuidae	9	15	24
Agrochola nitida	Noctuidae	1	5	6
Agrotis clavis	Noctuidae	0	1	1
Agrotis exclamationis	Noctuidae	801	641	1442
Agrotis ipsilon	Noctuidae	15	10	25
Agrotis segetum	Noctuidae	204	112	316
Alcis repandata	Geometridae	1	0	1
Allophyes oxyacanthae	Noctuidae	4	22	26
Alsophila aescularia	Geometridae	27	9	36
Amphipoea fucosa	Noctuidae	96	48	144
Amphipoea oculea	Noctuidae	10	1	11
Amphipyra pyramidea/berbera	Noctuidae	72	70	142
Amphipyra tragopoginis	Noctuidae	8	18	26
Anaplectoides prasina	Noctuidae	1	5	6
Anorthoa munda	Noctuidae	49	24	73
Apamea anceps	Noctuidae	38	44	82
Apamea crenata	Noctuidae	44	47	91
Apamea epomidion	Noctuidae	2	3	5
Apamea lithoxylaea	Noctuidae	17	8	25
Apamea monoglypha	Noctuidae	194	168	362
Apamea ophiogramma	Noctuidae	22	8	30
Apamea remissa	Noctuidae	47	42	89
Apamea scolopacina	Noctuidae	90	32	122
Apamea sordens	Noctuidae	95	139	234
Apamea unanimis	Noctuidae	0	2	2
Apeira syringaria	Geometridae	1	0	1
Aplocera plagiata	Geometridae	0	1	1
Apoda limacodes	Limacodidae	10	10	20
Archanara sparganii	Noctuidae	1	1	2
Arctia caja	Erebidae	1	1	2
Arenostola phragmitidis	Noctuidae	1	0	1
Asteroscopus sphinx	Noctuidae	16	35	51
Atethmia centrago	Noctuidae	0	1	1
Atypha pulmonaris	Noctuidae	1	3	4
Autographa gamma	Noctuidae	241	193	434
Autographa pulchrina	Noctuidae	1	1	2
Axylia putris	Noctuidae	326	432	758
Biston betularia	Geometridae	26	15	41
Biston strataria	Geometridae	11	2	13
Bupalus piniaria	Geometridae	0	2	2
Cabera exanthemata	Geometridae	41	14	55
Cabera pusaria	Geometridae	12	2	14
Calliteara pudibunda	Erebidae	10	3	13
Campaea margaritata	Geometridae	66	43	109
Camptogramma bilineata	Geometridae	40	14	54
Caradrina morpheus	Noctuidae	5	35	40
Catarhoe cuculata	Geometridae	3	4	7
Catocala nupta	Erebidae	6	6	12
Catocala promissa	Erebidae	2	0	2
Celaena leucostigma	Noctuidae	9	4	13
Cerapteryx graminis	Noctuidae	2	1	3
Cerastis leucographa	Noctuidae	7	1	8
Cerastis rubricosa	Noctuidae	6	3	9
Cerura erminea	Notodontidae	1	5	6
Cerura vinula	Notodontidae	1	0	1
Charanyca trigrammica	Noctuidae	167	196	363
Chiasmia clathrata	Geometridae	79	33	112
Chloroclysta siterata	Geometridae	2	4	6
Chortodes fluxa	Noctuidae	1	0	1
Cidaria fulvata	Geometridae	1	5	6
Clostera curtula	Notodontidae	14	5	19
Colocasia coryli	Noctuidae	2	1	3
Colostygia pectinataria	Geometridae	8	1	9
Colotois pennaria	Geometridae	9	13	22
Comibaena bajularia	Geometridae	6	9	15
Conisania luteago	Noctuidae	0	3	3
Conistra erythrocephala	Noctuidae	3	7	10
Conistra rubiginosa	Noctuidae	1	3	4
Conistra vaccinii	Noctuidae	24	30	54
Cosmia affinis	Noctuidae	3	1	4
Cosmia pyralina	Noctuidae	55	15	70
Cosmia trapezina	Noctuidae	178	96	274
Cosmorhoe ocellata	Geometridae	6	0	6
Cossus cossus	Cossidae	4	4	8
Costaconvexa polygrammata	Geometridae	0	2	2
Craniophora ligustri	Noctuidae	128	31	159
Crocallis elinguaria	Geometridae	7	4	11
Cryphia algae	Noctuidae	2	0	2
Cucullia umbratica	Noctuidae	2	2	4
Cybosia mesomella	Erebidae	2	1	3
Cyclophora albipunctata	Geometridae	0	1	1
Cyclophora linearia	Geometridae	0	1	1
Cyclophora porata	Geometridae	1	0	1
Cyclophora punctaria	Geometridae	5	3	8
Deilephila elpenor	Sphingidae	19	35	54
Deilephila porcellus	Sphingidae	7	4	11
Deltote bankiana	Noctuidae	54	46	100
Deltote deceptoria	Noctuidae	23	9	32
Dendrolimus pini	Lasiocampidae	2	0	2
Diachrysia chrysitis/tutti	Noctuidae	182	100	282
Diacrisia sannio	Erebidae	0	1	1
Diaphora mendica	Erebidae	3	0	3
Diarsia brunnea	Noctuidae	14	3	17
Diarsia mendica	Noctuidae	2	0	2
Diarsia rubi	Noctuidae	21	22	43
Dicycla oo	Noctuidae	1	0	1
Discestra trifolii	Noctuidae	317	217	534
Drepana falcataria	Drepanidae	13	5	18
Drymonia querna	Notodontidae	32	7	39
Drymonia ruficornis	Notodontidae	2	0	2
Dryobotodes eremita	Noctuidae	4	11	15
Dypterygia scabriuscula	Noctuidae	9	17	26
Dysauxes ancilla	Erebidae	0	1	1
Dysstroma citratum	Geometridae	8	5	13
Earias clorana	Nolidae	6	0	6
Ecliptopera silaceata	Geometridae	4	1	5
Ectropis crepuscularia	Geometridae	11	6	17
Egira conspicillaris	Noctuidae	2	0	2
Eilema complana	Erebidae	23	2	25
Eilema lutarella	Erebidae	1	0	1
Eilema sororcula	Erebidae	27	13	40
Emmelia trabealis	Noctuidae	2	1	3
Enargia paleacea	Noctuidae	4	3	7
Ennomos alniaria	Geometridae	2	0	2
Ennomos autumnaria	Geometridae	12	7	19
Epione repandaria	Geometridae	10	2	12
Epirrhoe alternata	Geometridae	233	143	376
Epirrhoe rivata	Geometridae	3	0	3
Epirrita christyi	Geometridae	1	0	1
Erannis defoliaria	Geometridae	1	6	7
Eucarta virgo	Noctuidae	5	0	5
Euchoeca nebulata	Geometridae	6	6	12
Eulithis mellinata	Geometridae	4	2	6
Eulithis prunata	Geometridae	1	1	2
Eulithis pyraliata	Geometridae	6	7	13
Euphyia unangulata	Geometridae	14	7	21
Eupithecia abbreviata	Geometridae	22	3	25
Eupithecia abietaria	Geometridae	0	1	1
Eupithecia absinthiata	Geometridae	12	16	28
Eupithecia analoga	Geometridae	3	0	3
Eupithecia assimilata	Geometridae	0	1	1
Eupithecia centaureata	Geometridae	28	13	41
Eupithecia dodoneata	Geometridae	62	12	74
Eupithecia icterata	Geometridae	1	0	1
Eupithecia indigata	Geometridae	26	3	29
Eupithecia innotata	Geometridae	1	0	1
Eupithecia lanceata	Geometridae	1	1	2
Eupithecia satyrata	Geometridae	1	0	1
Eupithecia sp	Geometridae	2	0	2
Eupithecia subfuscata	Geometridae	23	8	31
Eupithecia subumbrata	Geometridae	0	1	1
Eupithecia succenturiata	Geometridae	1	3	4
Eupithecia tenuiata	Geometridae	1	0	1
Eupithecia trisignaria	Geometridae	1	3	4
Euplexia lucipara	Noctuidae	5	5	10
Euproctis chrysorrhoea	Erebidae	8	4	12
Eupsilia transversa	Noctuidae	35	45	80
Falcaria lacertinaria	Drepanidae	2	0	2
Furcula bifida	Notodontidae	1	1	2
Geometra papilionaria	Geometridae	2	1	3
Gortyna flavago	Noctuidae	0	4	4
Gymnoscelis rufifasciata	Geometridae	2	0	2
Habrosyne pyritoides	Drepanidae	34	29	63
Hada plebeja	Noctuidae	2	0	2
Hadena bicruris	Noctuidae	2	1	3
Hadena perplexa	Noctuidae	2	1	3
Harpyia milhauseri	Notodontidae	1	0	1
Heliothis adaucta	Noctuidae	0	1	1
Heliothis viriplaca	Noctuidae	3	7	10
Hemithea aestivaria	Geometridae	0	2	2
Hepialus humuli	Hepialidae	110	25	135
Herminia grisealis	Erebidae	1	0	1
Herminia tarsicrinalis	Erebidae	8	3	11
Hoplodrina ambigua	Noctuidae	273	134	407
Hoplodrina blanda	Noctuidae	607	535	1142
Hoplodrina octogenaria	Noctuidae	3168	1630	4798
Hydraecia micacea	Noctuidae	21	11	32
Hydrelia flammeolaria	Geometridae	1	0	1
Hydriomena furcata	Geometridae	6	9	15
Hydriomena impluviata	Geometridae	1	0	1
Hylaea fasciaria	Geometridae	1	0	1
Hyles euphorbiae	Sphingidae	2	1	3
Hyles galii	Sphingidae	4	5	9
Hyloicus pinastri	Sphingidae	0	2	2
Hypena proboscidalis	Erebidae	1020	270	1290
Hypomecis punctinalis	Geometridae	22	17	39
Hypomecis roboraria	Geometridae	4	4	8
Idaea aversata	Geometridae	133	52	185
Idaea biselata	Geometridae	225	61	286
Idaea dimidiata	Geometridae	239	88	327
Idaea fuscovenosa	Geometridae	3	0	3
Idaea muricata	Geometridae	1	0	1
Idaea ochrata	Geometridae	1	0	1
Idaea seriata	Geometridae	1	0	1
Ipimorpha retusa	Noctuidae	3	0	3
Ipimorpha subtusa	Noctuidae	12	2	14
Lacanobia aliena	Noctuidae	0	1	1
Lacanobia oleracea	Noctuidae	164	116	280
Lacanobia suasa	Noctuidae	74	21	95
Lacanobia thalassina	Noctuidae	24	23	47
Lacanobia w-latinum	Noctuidae	4	4	8
Laothoe populi	Sphingidae	39	24	63
Laspeyria flexula	Erebidae	4	5	9
Ligdia adustata	Geometridae	10	4	14
Lithophane ornitopus	Noctuidae	30	20	50
Lithophane semibrunnea	Noctuidae	0	1	1
Lithophane socia	Noctuidae	3	1	4
Lobophora halterata	Geometridae	1	3	4
Lomaspilis marginata	Geometridae	206	108	314
Lomographa temerata	Geometridae	9	7	16
Luperina testacea	Noctuidae	108	103	211
Lycia hirtaria	Geometridae	1	1	2
Lymantria dispar	Erebidae	3	3	6
Lymantria monacha	Erebidae	16	3	19
Macaria alternata	Geometridae	7	8	15
Macaria liturata	Geometridae	21	17	38
Macaria notata	Geometridae	54	16	70
Macaria signaria	Geometridae	1	0	1
Macdunnoughia confusa	Noctuidae	32	8	40
Macrochilo cribrumalis	Erebidae	0	1	1
Malacosoma neustria	Lasiocampidae	0	2	2
Mamestra brassicae	Noctuidae	86	60	146
Melanchra persicariae	Noctuidae	24	23	47
Mesapamea secalis	Noctuidae	1083	302	1385
Mesogona oxalina	Noctuidae	0	1	1
Mesoligia furuncula	Noctuidae	16	17	33
Mimas tiliae	Sphingidae	10	1	11
Minucia lunaris	Erebidae	1	0	1
Mythimna albipuncta	Noctuidae	308	131	439
Mythimna conigera	Noctuidae	222	120	342
Mythimna ferrago	Noctuidae	94	30	124
Mythimna impura	Noctuidae	385	257	642
Mythimna l-album	Noctuidae	13	12	25
Mythimna obsoleta	Noctuidae	8	17	25
Mythimna pallens	Noctuidae	115	45	160
Mythimna pudorina	Noctuidae	13	25	38
Mythimna scirpi	Noctuidae	0	1	1
Naenia typica	Noctuidae	0	2	2
Noctua comes	Noctuidae	259	167	426
Noctua fimbriata	Noctuidae	99	93	192
Noctua interjecta	Noctuidae	18	9	27
Noctua interposita	Noctuidae	12	14	26
Noctua janthe	Noctuidae	155	77	232
Noctua janthina	Noctuidae	15	15	30
Noctua orbona	Noctuidae	0	1	1
Noctua pronuba	Noctuidae	1643	1558	3201
Nonagria typhae	Noctuidae	4	2	6
Notodonta dromedarius	Notodontidae	28	17	45
Notodonta tritophus	Notodontidae	1	2	3
Notodonta ziczac	Notodontidae	12	9	21
Nycteola revayana	Nolidae	2	0	2
Ochropacha duplaris	Drepanidae	2	1	3
Ochropleura plecta	Noctuidae	964	644	1608
Odontopera bidentata	Geometridae	1	0	1
Oligia fasciuncula	Noctuidae	2	5	7
Oligia latruncula	Noctuidae	81	79	160
Oligia strigilis	Noctuidae	439	703	1142
Operophtera fagata	Geometridae	1	0	1
Opisthograptis luteolata	Geometridae	11	5	16
Orgyia antiqua	Erebidae	1	1	2
Oria musculosa	Noctuidae	0	1	1
Orthonama obstipata	Noctuidae	1	0	1
Orthosia cerasi	Noctuidae	2	0	2
Orthosia cruda	Noctuidae	1017	787	1804
Orthosia gothica	Noctuidae	264	122	386
Orthosia gracilis	Noctuidae	1802	1205	3007
Orthosia incerta	Noctuidae	1057	609	1666
Orthosia miniosa	Noctuidae	5	3	8
Orthosia populeti	Noctuidae	24	14	38
Panolis flammea	Noctuidae	22	2	24
Paradrina clavipalpis	Noctuidae	1	1	2
Parascotia fuliginaria	Erebidae	1	0	1
Parastichtis suspecta	Noctuidae	1	0	1
Parastichtis ypsillon	Noctuidae	5	12	17
Parectropis similaria	Geometridae	2	1	3
Pasiphila chloerata	Geometridae	1	0	1
Pasiphila rectangulata	Geometridae	41	50	91
Pechipogo strigilata	Erebidae	1	0	1
Pelurga comitata	Geometridae	16	3	19
Peribatodes rhomboidaria	Geometridae	14	12	26
Peribatodes secundaria	Geometridae	3	0	3
Peridea anceps	Notodontidae	3	0	3
Perizoma affinitata	Geometridae	0	1	1
Perizoma albulata	Geometridae	1	0	1
Perizoma alchemillata	Geometridae	121	57	178
Perizoma flavofasciata	Geometridae	4	1	5
Petrophora chlorosata	Geometridae	1	0	1
Phalera bucephala	Notodontidae	30	48	78
Pheosia gnoma	Notodontidae	15	3	18
Pheosia tremula	Notodontidae	66	18	84
Phlogophora meticulosa	Noctuidae	33	38	71
Phragmatobia fuliginosa	Erebidae	195	210	405
Phymatopus hecta	Hepialidae	13	8	21
Plagodis dolabraria	Geometridae	7	4	11
Polia bombycina	Noctuidae	0	2	2
Polia nebulosa	Noctuidae	9	11	20
Polyploca ridens	Drepanidae	0	1	1
Protodeltote pygarga	Noctuidae	16	11	27
Pseudeustrotia candidula	Noctuidae	3	1	4
Pseudoips prasinanus	Nolidae	1	0	1
Pterostoma palpina	Notodontidae	23	17	40
Ptilophora plumigera	Notodontidae	0	1	1
Pungeleria capreolaria	Geometridae	1	0	1
Pyrrhia umbra	Noctuidae	2	1	3
Rhizedra lutosa	Noctuidae	12	14	26
Rivula sericealis	Erebidae	1159	517	1676
Rusina ferruginea	Noctuidae	47	43	90
Scoliopteryx libatrix	Erebidae	5	3	8
Scopula incanata	Geometridae	1	0	1
Scopula marginepunctata	Geometridae	1	0	1
Scopula nigropunctata	Geometridae	1	0	1
Scopula ornata	Geometridae	1	0	1
Sedina pygmina	Noctuidae	1	2	3
Selenia dentaria	Geometridae	5	2	7
Selenia tetralunaria	Geometridae	1	3	4
Shargacucullia scrophulariae	Noctuidae	3	4	7
Sideridis rivularis	Noctuidae	2	0	2
Sideridis turbida	Noctuidae	1	1	2
Simyra albovenosa	Noctuidae	1	4	5
Siona lineata	Geometridae	3	4	7
Smerinthus ocellatus	Sphingidae	2	3	5
Sphinx ligustri	Sphingidae	0	3	3
Spilosoma lubricipedum	Erebidae	197	178	375
Spilosoma luteum	Erebidae	157	149	306
Stauropus fagi	Notodontidae	2	3	5
Tethea ocularis	Drepanidae	5	4	9
Tethea or	Drepanidae	1	1	2
Thalera fimbrialis	Geometridae	0	1	1
Thalpophila matura	Noctuidae	1	0	1
Thaumetopoea pinivora	Notodontidae	0	2	2
Thaumetopoea processionea	Notodontidae	22	3	25
Thera obeliscata	Geometridae	1	6	7
Thera variata	Geometridae	12	7	19
Tholera decimalis	Noctuidae	5	9	14
Thyatira batis	Drepanidae	3	1	4
Timandra comai	Geometridae	252	77	329
Trachea atriplicis	Noctuidae	129	114	243
Triodia sylvina	Hepialidae	49	40	89
Trisateles emortualis	Erebidae	2	0	2
Venusia cambrica	Geometridae	1	0	1
Watsonalla binaria	Drepanidae	16	10	26
Xanthia aurago	Noctuidae	0	1	1
Xanthia citrago	Noctuidae	1	0	1
Xanthia icteritia	Noctuidae	10	14	24
Xanthia ocellaris	Noctuidae	1	1	2
Xanthia togata	Noctuidae	0	1	1
Xanthorhoe biriviata	Geometridae	1	0	1
Xanthorhoe designata	Geometridae	0	1	1
Xanthorhoe ferrugata	Geometridae	265	134	399
Xanthorhoe fluctuata	Geometridae	101	52	153
Xanthorhoe montanata	Geometridae	16	20	36
Xanthorhoe quadrifasciata	Geometridae	32	19	51
Xanthorhoe spadicearia	Geometridae	4	0	4
Xestia baja	Noctuidae	8	4	12
Xestia c-nigrum	Noctuidae	4133	2665	6798
Xestia ditrapezium	Noctuidae	1	0	1
Xestia sexstrigata	Noctuidae	45	23	68
Xestia stigmatica	Noctuidae	11	3	14
Xestia triangulum	Noctuidae	196	321	517
Xestia xanthographa	Noctuidae	359	162	521
Zanclognatha tarsipennalis	Erebidae	13	10	23
Zeuzera pyrina	Cossidae	2	3	5
Total abundance		29953	19519	49472
Total richness		334	299	372

## Sheet: deleted
40				Apamea monoglypha?	1	0	1	Apamea monoglypha?
309	Nymphalidae	Polygonia c-album		Pol.c-alb	1	0	1	Polygonia c-album
305	Pieridae	Pieris rapae		Pie.rapa	3	0	3	Pieris rapae
